# Supplementary material
Source: PubMed Central journal article supplement (PMC6779125)
Supplement: NIHMS1002244-supplement-ts2ts3.pdf [file NIHMS1002244-supplement-ts2ts3.pdf]

| Gene       | k | C <sub>k</sub> 5' location | C <sub>k</sub> 3' location |
|------------|---|----------------------------|----------------------------|
| <i>hb</i>  | 1 | 0.7431                     | 0.4237                     |
|            | 2 | 0.6806                     | 0.3705                     |
|            | 3 | 0.6510                     | 0.3433                     |
|            | 4 | 0.6337                     | 0.3268                     |
| <i>Kr</i>  | 1 | 0.7447                     | 0.4615                     |
|            | 2 | 0.6804                     | 0.4157                     |
|            | 3 | 0.6547                     | 0.3905                     |
|            | 4 | 0.6408                     | 0.3739                     |
| <i>kni</i> | 1 | 0.6368                     | 0.3507                     |
|            | 2 | 0.5547                     | 0.3116                     |
|            | 3 | 0.5264                     | 0.2912                     |
|            | 4 | 0.5127                     | 0.2785                     |
| <i>gt</i>  | 1 | 0.8072                     | 0.5087                     |
|            | 2 | 0.7509                     | 0.4616                     |
|            | 3 | 0.7246                     | 0.4383                     |
|            | 4 | 0.7093                     | 0.4240                     |

Supplemental Table S2: Conversion factors used to convert the k<sup>th</sup> cumulants from cytoplasmic units to Pol II counts, Related to STAR Methods.

| Gene       | Annotated length [bp] | Pol II ChIP [bp] | Effective length [bp] |
|------------|-----------------------|------------------|-----------------------|
| <i>hb</i>  | 3621                  | 3685             | 3635                  |
| <i>Kr</i>  | 2909                  | 3671             | 3710                  |
| <i>kni</i> | 3049                  | 3561             | 3810                  |
| <i>gt</i>  | 1855                  | 2360             | 2740                  |

Supplemental Table S3: Gene length for the gap genes, Related to STAR Methods.
