# Supplementary material
Source: PubMed Central journal article supplement (PMC6779125)

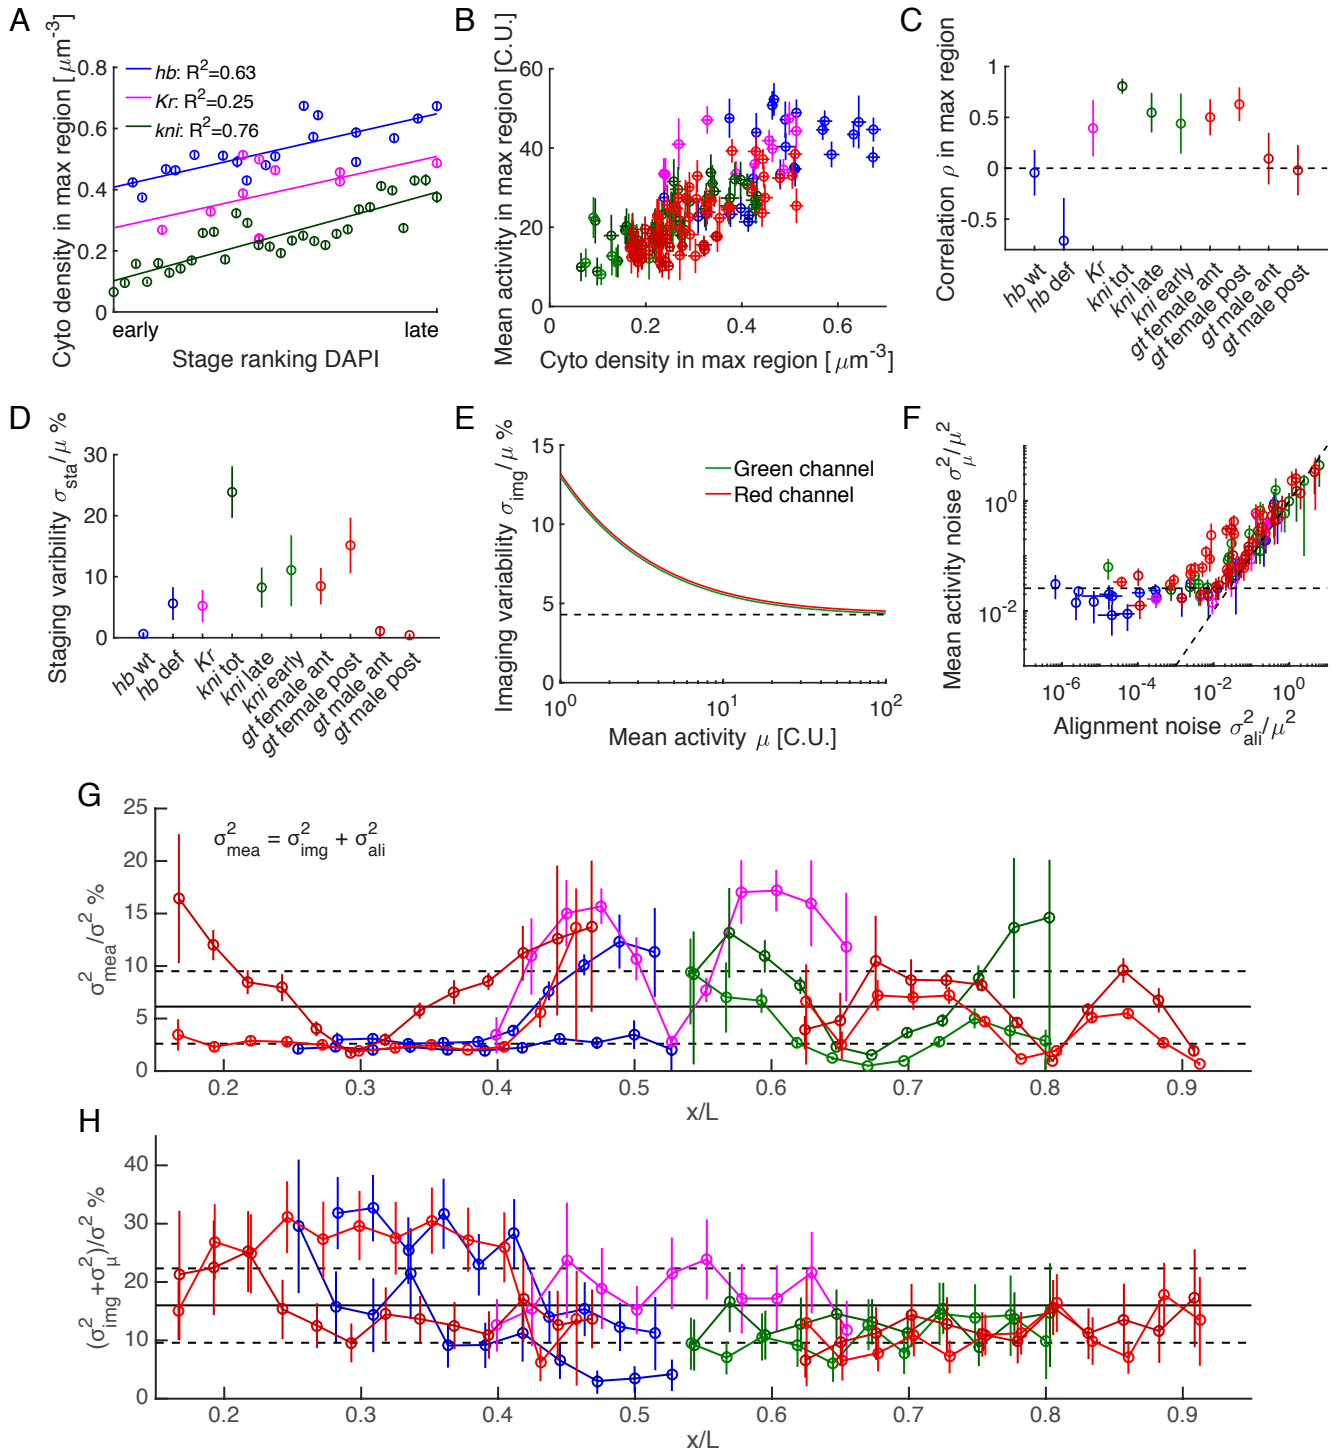

Supplement: NIHMS1002244-supplement-fs1.pdf [file NIHMS1002244-supplement-fs1.pdf]

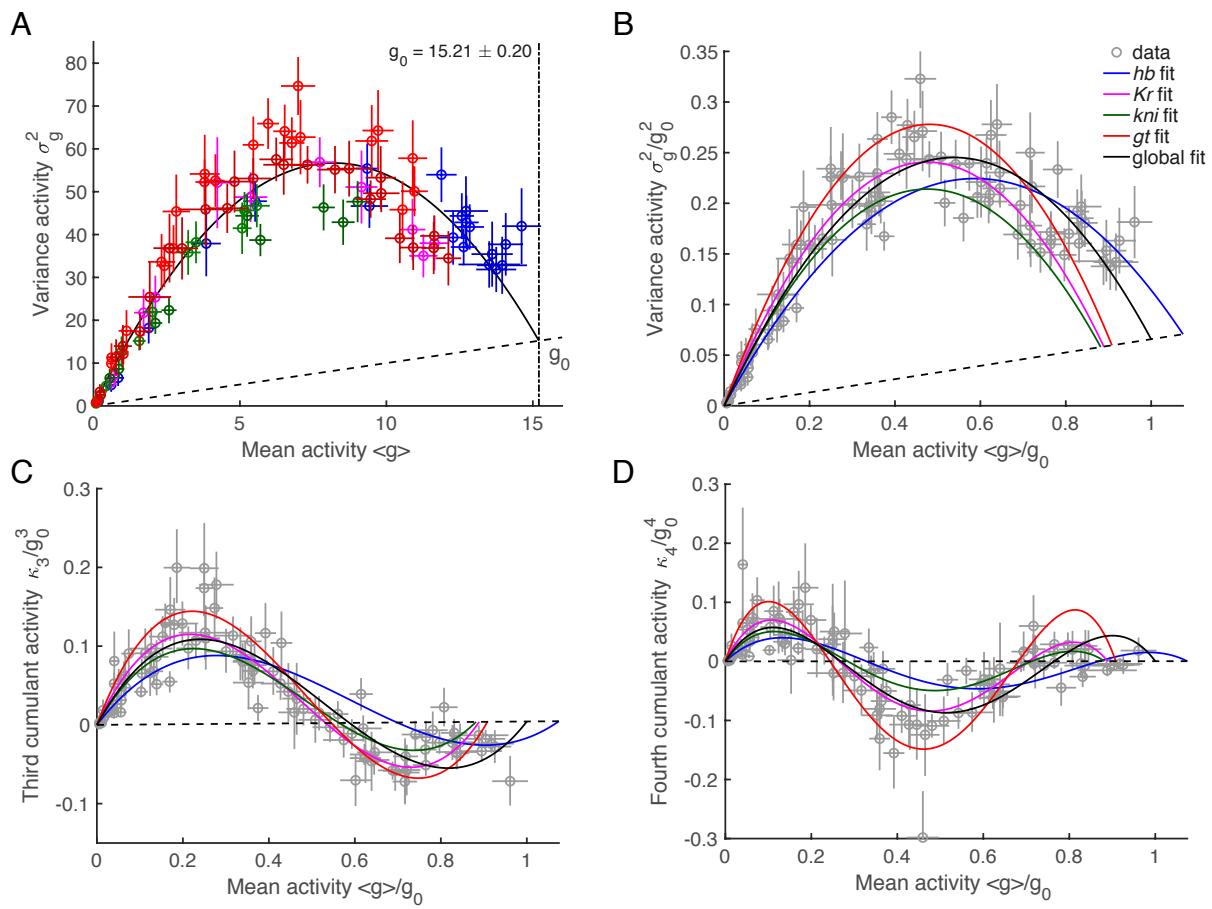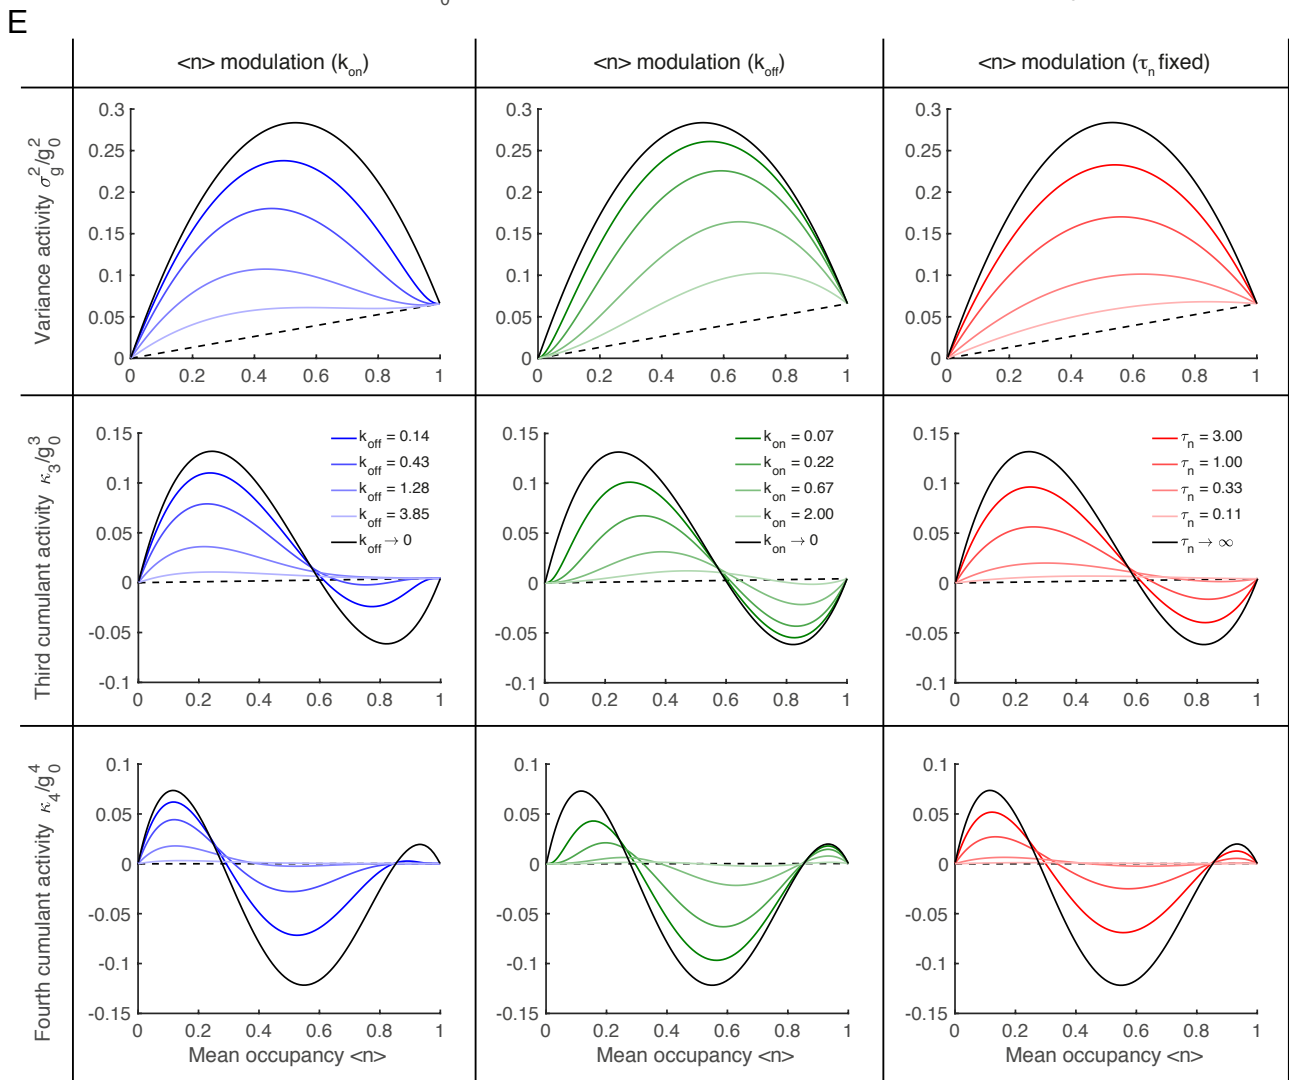

Supplement: NIHMS1002244-supplement-fs2.pdf [file NIHMS1002244-supplement-fs2.pdf]

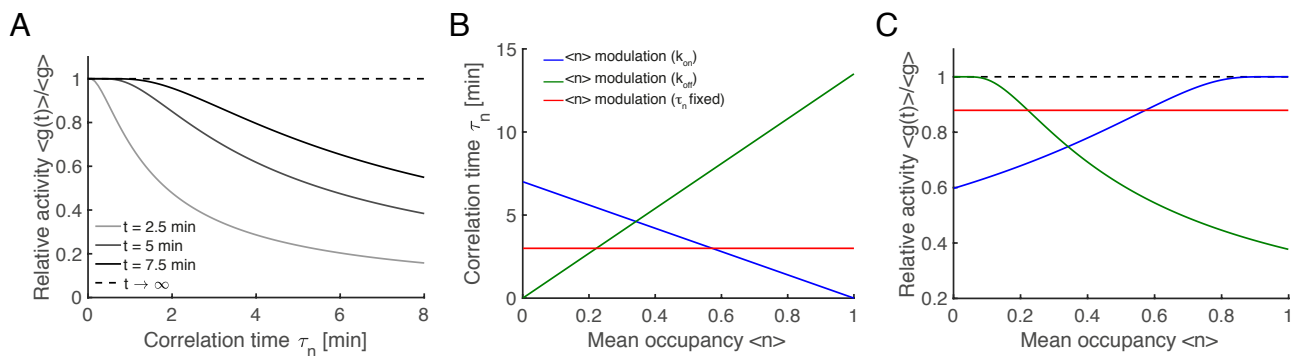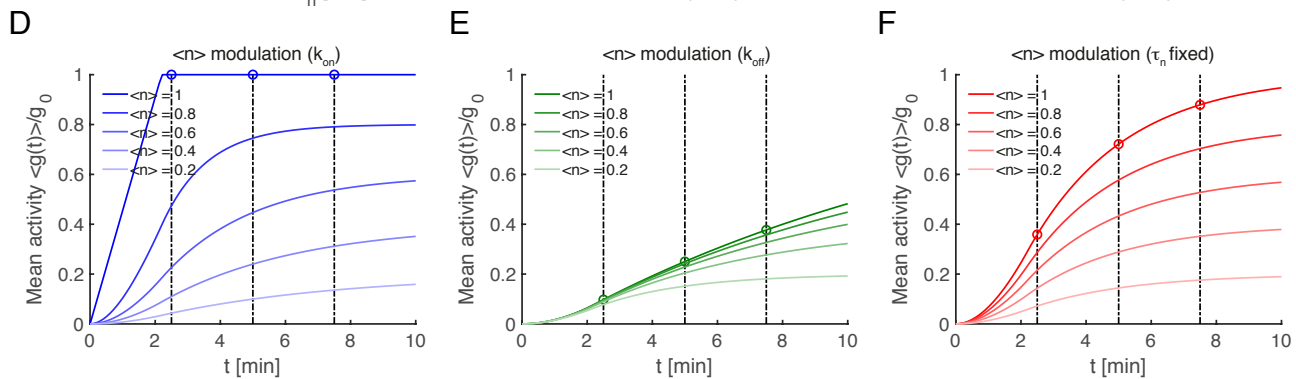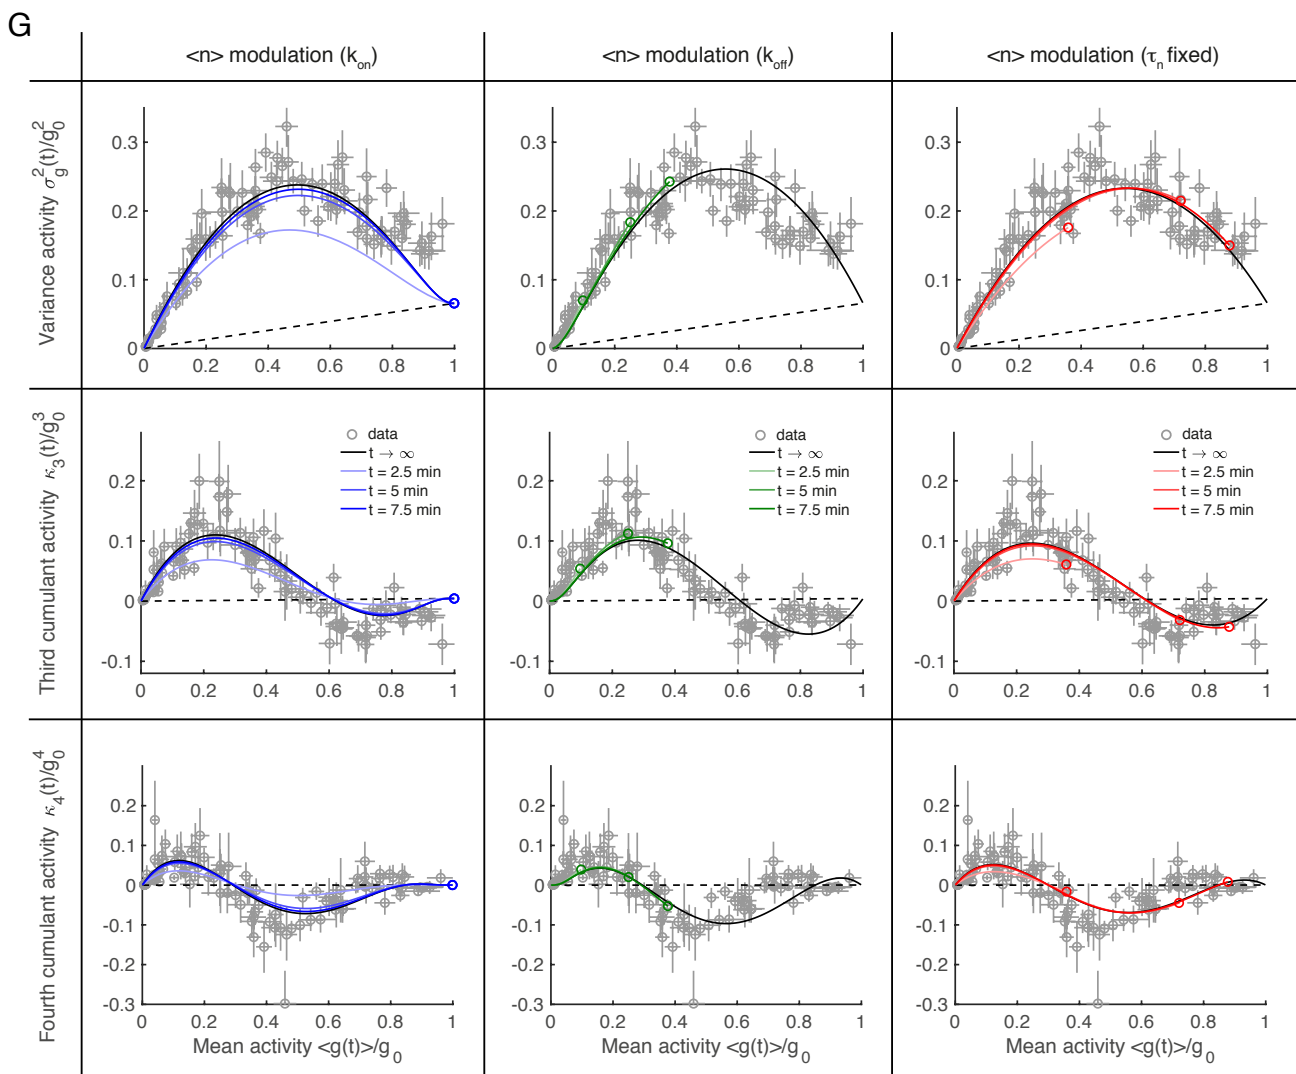

Supplement: NIHMS1002244-supplement-fs3.pdf [file NIHMS1002244-supplement-fs3.pdf]

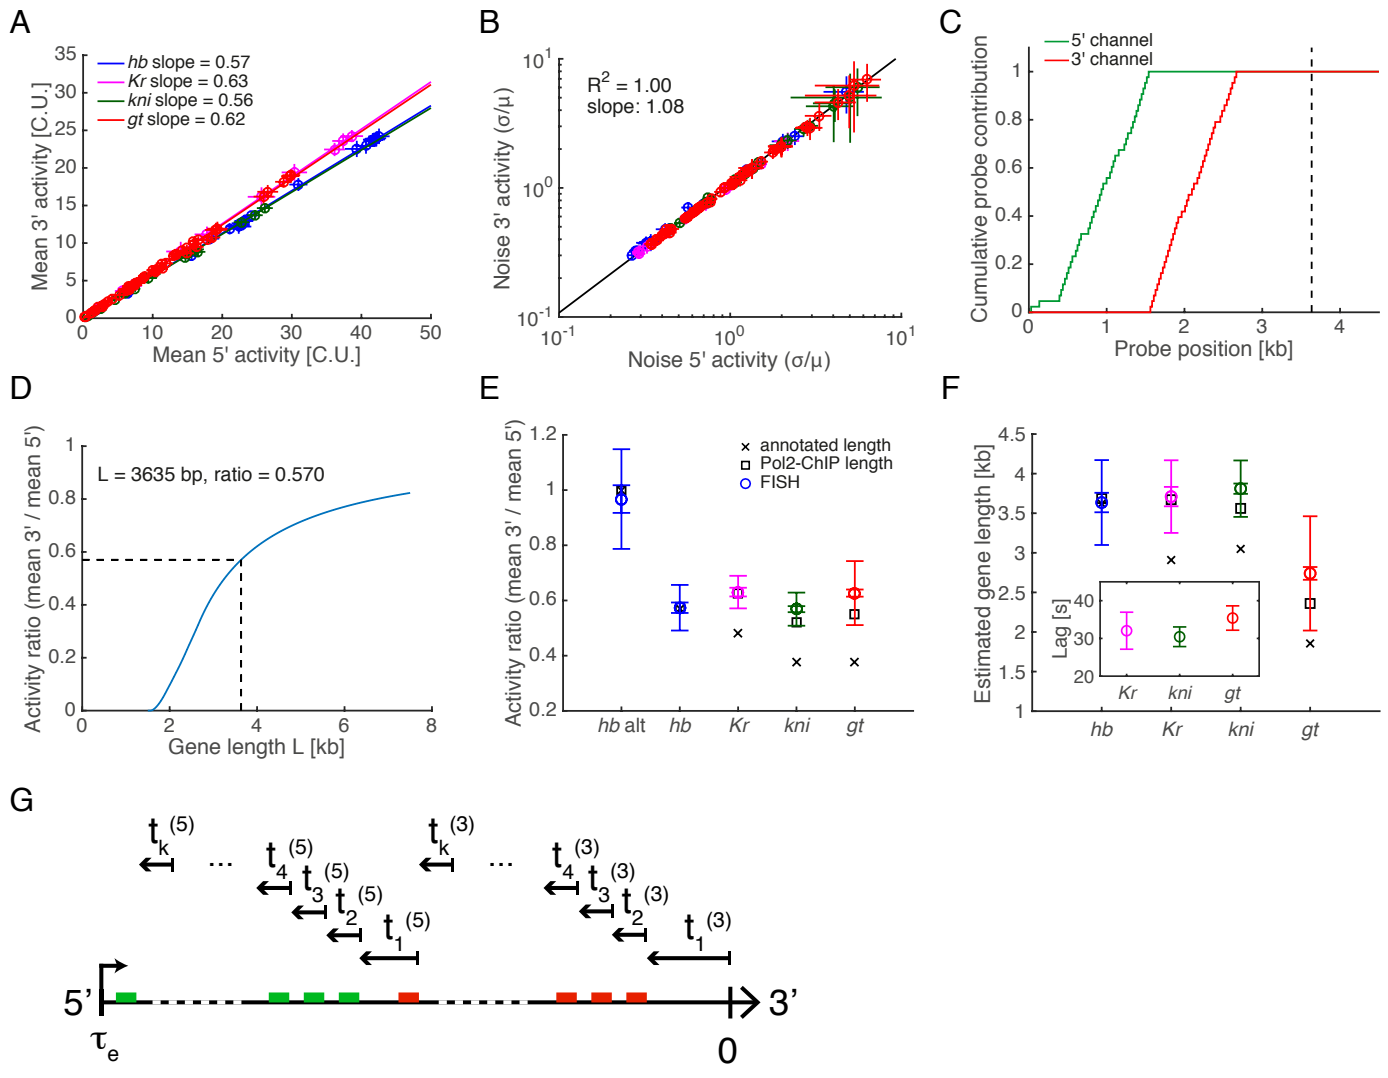

Supplement: NIHMS1002244-supplement-fs4.pdf [file NIHMS1002244-supplement-fs4.pdf]

A

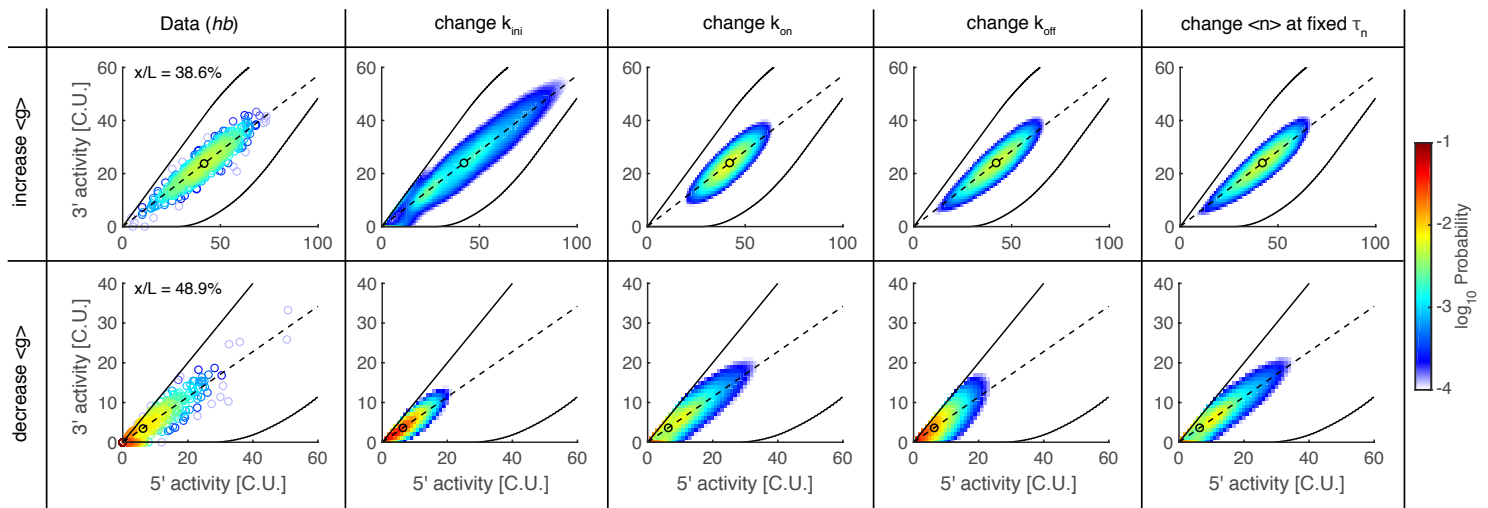

B

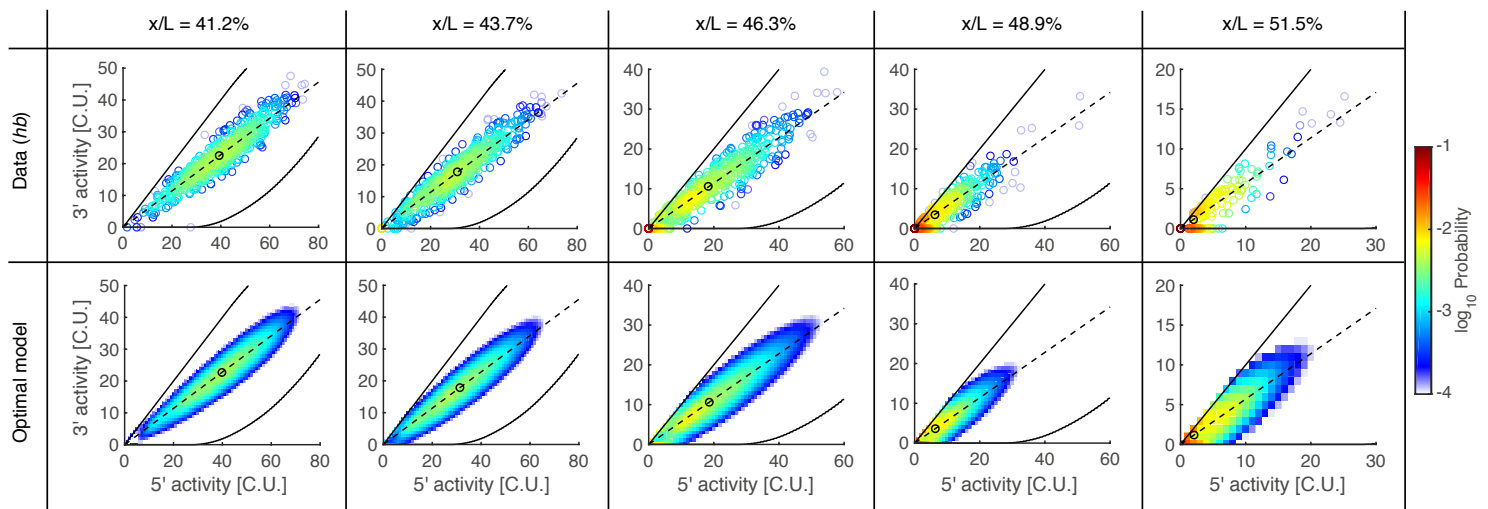

C

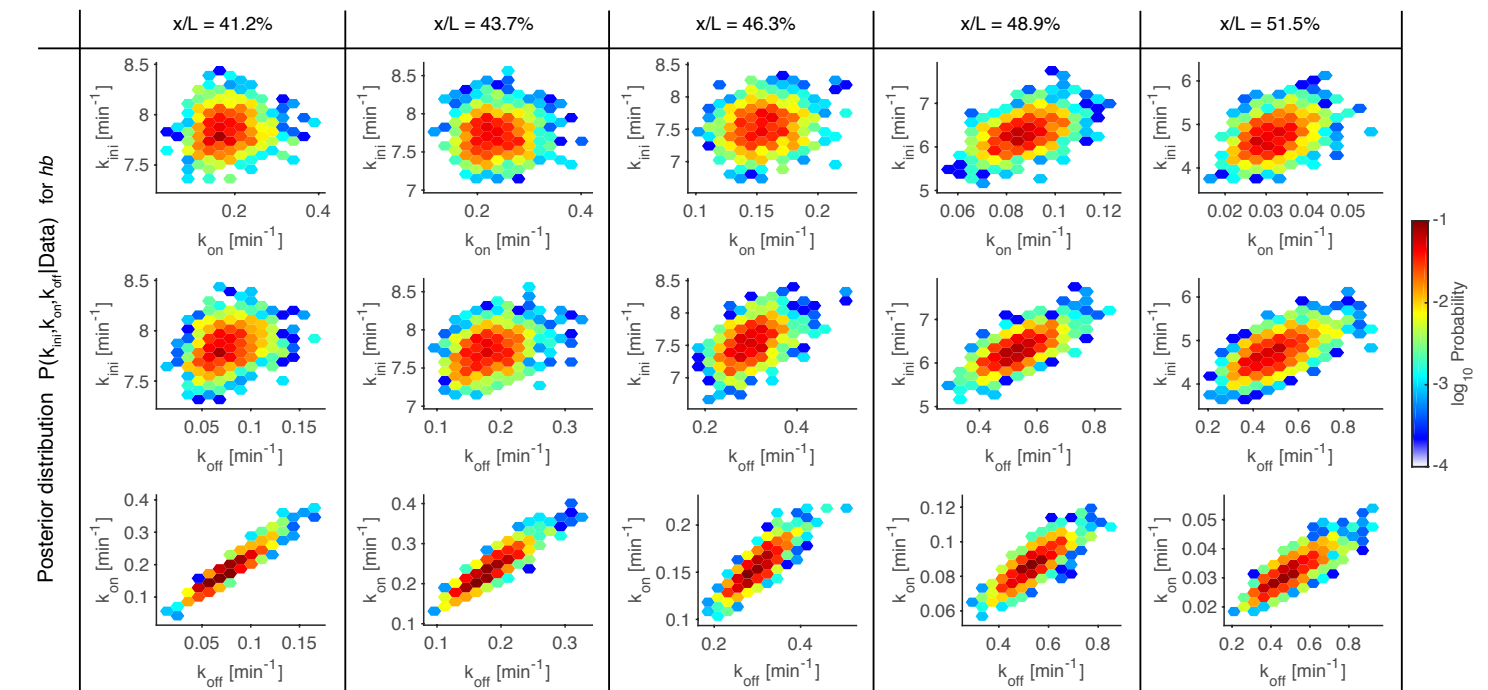

Supplement: NIHMS1002244-supplement-fs5.pdf [file NIHMS1002244-supplement-fs5.pdf]

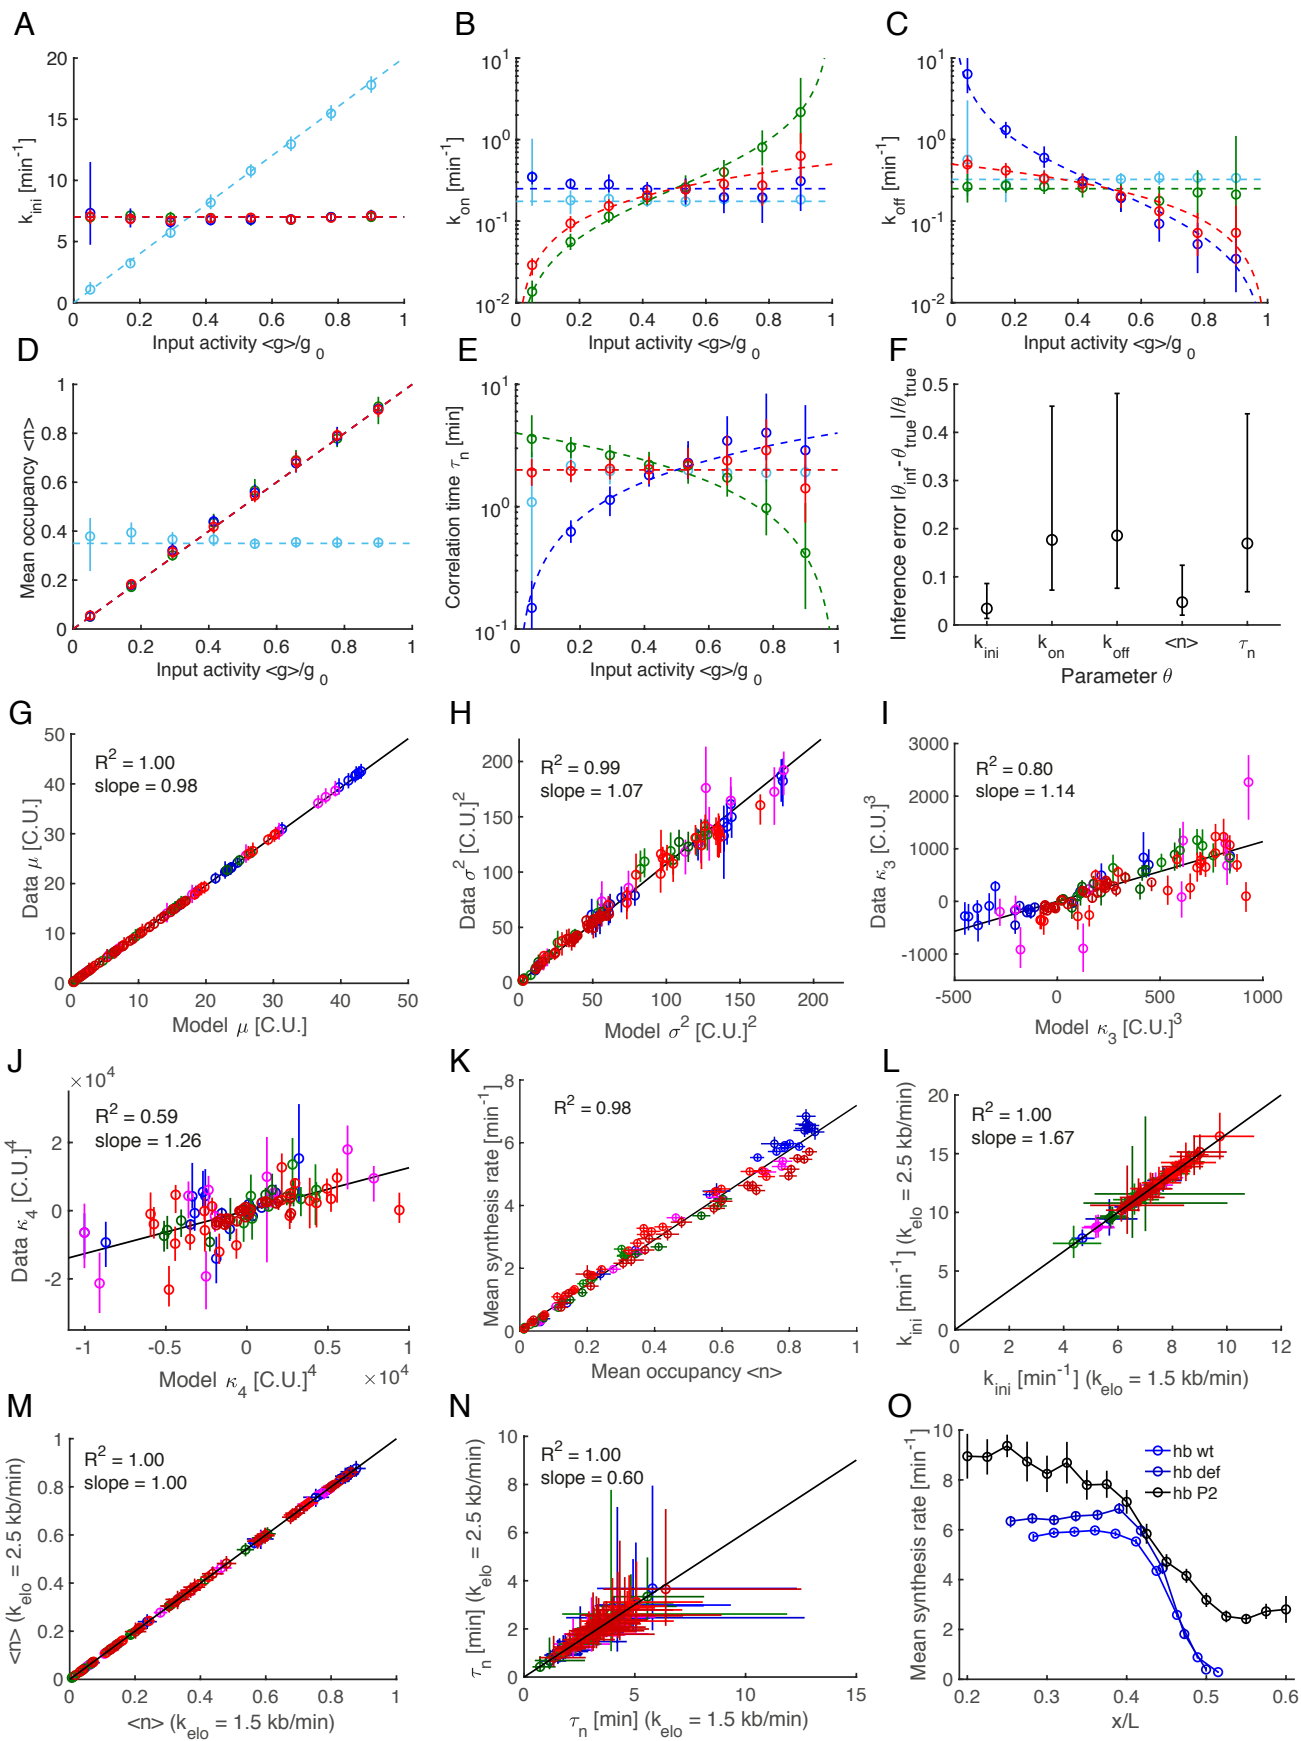

Supplement: NIHMS1002244-supplement-fs6.pdf [file NIHMS1002244-supplement-fs6.pdf]
